# Supplementary material
Source: HighWire-hosted journal article supplement (http://www.qdcxjkg.com/highwire/filestream/113303/field_highwire_adjunct_files/0/294682it.pdf)
Supplement: 294682it.pdf [file 294682it.pdf]

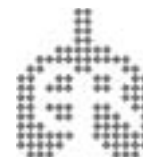

# Terapia di associazione beclometasone/formoterolo versus budesonide/formoterolo nell'asma

A. Papi<sup>\*</sup>, P.L. Paggiaro<sup>#</sup>, G. Nicolini<sup>¶</sup>, A.M. Vignola<sup>†</sup> e L.M. Fabbri<sup>§</sup> per conto del gruppo di studio ICAT SY (Inhaled Combination Asthma Treatment versus SYmbicort)<sup>f</sup>

**ABSTRACT:** Il presente studio è stato disegnato per confrontare l'associazione fissa di beclometasone e formoterolo in un inalatore dosato pressurizzato (pMDI) Modulite<sup>®</sup> (Chiesi Farmaceutici, Parma, Italia) in idrofluoroalcani, con l'associazione di budesonide e formoterolo somministrata tramite inalatore a polvere secca (DPI) Turbuhaler<sup>®</sup> (AstraZeneca, Lund, Svezia).

È stato condotto uno studio controllato di fase III, multinazionale, multicentrico, in doppio cieco, *double dummy*, randomizzato, a gruppi paralleli. Dopo un periodo di run-in di 2 settimane, 219 pazienti con asma da moderata a grave sono stati randomizzati a un trattamento di 12 settimane con 200 mcg di beclometasone più 12 mcg di formoterolo b.i.d. somministrati tramite pMDI o 400 mcg di budesonide più 12 mcg di formoterolo b.i.d. somministrato tramite DPI.

L'analisi di non inferiorità sull'outcome primario, il picco di flusso espiratorio mattutino nelle ultime 2 settimane di trattamento, non ha mostrato alcuna differenza tra i gruppi. È stato osservato un miglioramento statisticamente significativo della funzionalità polmonare, dei sintomi e dell'uso di farmaco al bisogno rispetto al basale in entrambi i gruppi per l'intero periodo di trattamento. Non è stata osservata alcuna differenza tra i trattamenti né nell'incidenza di riacutizzazioni asmatiche né nella frequenza degli eventi avversi.

La nuova associazione fissa di beclometasone e formoterolo in pMDI Modulite<sup>®</sup> in idrofluoroalcani è equivalente alla associazione presente sul mercato di budesonide e formoterolo in termini di efficacia e di profilo di tollerabilità.

**PAROLE CHIAVE:** Asma, beclometasone, budesonide, terapia di combinazione, extrafine, formoterolo

Le linee guida internazionali raccomandano l'aggiunta di  $\beta_2$ -agonisti a lunga durata d'azione (LABA) ad una dose da bassa a media di corticosteroidi inalatori (CSI) in pazienti la cui asma non sia controllata con il solo CSI [1]. Numerosi studi clinici hanno dimostrato che l'aggiunta di LABA ai CSI porta maggiori benefici rispetto ad un aumento della dose del solo CSI in termini di controllo sintomatico e funzionalità polmonare [2-6]. Un trattamento con associazione di CSI/LABA in un singolo inalatore, con la stessa efficacia e sicurezza dei due farmaci somministrati separatamente, può anche determinare una migliore aderenza al trattamento [7-9].

Il beclometasone dipropionato (BDP) è un CSI ampiamente utilizzato con un buon rapporto rischio/beneficio [10]. Il BDP è stato recentemente sviluppato come formulazione extra-fine, con idrofluoroalcano (HFA) come

propellente, che si è dimostrata efficace nel controllo dei sintomi asmatici sia negli adulti che nei bambini con una dose giornaliera più bassa di 2,5 volte rispetto al BDP con clorofluorocarburi (CFC) [11-13].

Il rationale che sottende alla formulazione extra-fine di un CSI si basa principalmente sull'accumulo di prove a testimonianza del fatto che nell'asma il processo di infiammazione e di rimodellamento ha luogo in ogni parte delle vie respiratorie, compresi i bronchioli periferici [14-20]. Dal momento che le formulazioni extra-fine consentono la veicolazione di farmaco alle vie respiratorie sia centrali che periferiche [21], l'infiammazione potrebbe essere trattata in maniera uniforme per tutto il tratto respiratorio inferiore. Una dose ridotta di CSI comporta un'esposizione sistemica inferiore e nel complesso un rischio minore dovuto agli effetti collaterali degli steroidi [22].

## AFFILIAZIONI

\*Centro di ricerca su asma e BPCO, Università di Ferrara, Ferrara, #Dipartimento Cardio-Toracico, Fisiopatologia respiratoria, Università di Pisa, Pisa, ¶Medical Department, Chiesi Farmaceutici, Parma, †Istituto di Fisiopatologia respiratoria, Consiglio Nazionale delle Ricerche, Palermo, e, §Clinica di malattie dell'apparato respiratorio, Università di Modena e Reggio Emilia, Modena, Italia. <sup>f</sup>I membri sono elencati nella sezione dei Ringraziamenti.

## CORRISPONDENZA

L.M. Fabbri  
Clinica di malattie dell'apparato respiratorio, Università di Modena e Reggio Emilia  
Via del Pozzo, 71  
41100 Modena  
Italia  
Fax: 39 0594224231  
E-mail: [fabbri.leonardo@unimore.it](mailto:fabbri.leonardo@unimore.it)

Ricevuto:  
21 Luglio 2006  
Approvato dopo revisione:  
3 Novembre 2006

DICHIARAZIONE DI SUPPORTO  
Lo studio è stato supportato da Chiesi Farmaceutici S.p.A. G.Nicolini è un dipendente del promotore dello studio.

DICHIARAZIONE DI CONFLITTO DI INTERESSI  
Le dichiarazioni di conflitto d'interessi relative ad A. Papi, P.L. Paggiaro, G. Nicolini e L.M. Fabbri si trovano all'indirizzo [www.erj.ersjournals.com/misc/statements.shtml](http://www.erj.ersjournals.com/misc/statements.shtml)

European Respiratory Journal  
Print ISSN 0903-1936  
Online ISSN 1399-3003

Una nuova tecnologia denominata Modulite<sup>®</sup> (Chiesi Farmaceutici, Parma, Italia), che utilizza il propellente HFA-134a, è stata elaborata di recente per ottenere una formulazione in soluzione extra-fine di nuovi farmaci, così come una riformulazione di farmaci preesistenti in inalatori pressurizzati (pMDI) [23]. Questa tecnologia è stata utilizzata per formulare la prima associazione fissa contenente BDP extra-fine e formoterolo in soluzione HFA con dispositivo pMDI.

Lo scopo principale del presente studio è stato quello di verificare se l'efficacia e la tollerabilità dell'associazione fissa BDP/formoterolo (BDP/F) pMDI HFA Modulite<sup>®</sup> fossero equivalenti a quelle di un inalatore a polvere secca (DPI) Turbuhaler<sup>®</sup> (AstraZeneca, Lund, Svezia) con budesonide/formoterolo (BUD/F) in pazienti con asma da moderata a grave i cui sintomi non fossero controllati con il solo CSI.

L'associazione BUD/F è stata scelta come confronto poiché contiene lo stesso LABA, cioè il formoterolo. Poiché la formulazione BDP extra-fine consente il rilascio ai polmoni di una percentuale maggiore della dose nominale, la dose di BDP utilizzata nel presente studio è pari alla metà della dose di BUD e, in conformità alle linee guida internazionali del progetto mondiale asma (GINA), le dosi giornaliere di 400 mcg BDP extra-fine e 800 mcg BUD sono equivalenti [1].

## PAZIENTI E METODI

### Pazienti

Il presente studio è stato condotto in 13 centri europei. I pazienti adulti di età compresa tra i 18 e i 65 anni con asma persistente da moderata a grave e con un volume espiratorio forzato nel primo secondo (FEV<sub>1</sub>) compreso tra il 50 e l'80% dei valori normali di riferimento, sono stati ritenuti idonei a prendere parte allo studio. Tutti i pazienti erano trattati in precedenza con una dose giornaliera di CSI  $\leq 1.000$  mcg di BDP o equivalente, e presentavano sintomi asmatici non adeguatamente controllati. La mancanza di un adeguato controllo era definita come: presenza di sintomi asmatici giornalieri più di una volta a settimana, sintomi asmatici durante la notte più di due volte al mese e uso quotidiano di  $\beta_2$ -agonisti a breve durata d'azione. Di conseguenza, non essendo controllati con basse-medie dosi di CSI, secondo le linee guida internazionali [1], sono stati classificati come pazienti affetti da asma persistente moderata. Queste caratteristiche, basate su anamnesi recente, sono state confermate nelle 2 settimane di run-in.

I pazienti che rispondevano ad uno qualsiasi dei seguenti criteri sono stati esclusi dallo studio: broncopneumopatia cronica ostruttiva; fumatori o ex fumatori ( $\geq 10$  pacchetti/anno); riacutizzazione grave dell'asma o infezione sintomatica delle vie respiratorie nelle 8 settimane precedenti lo studio; tre o più cicli di corticosteroidi orali od ospedalizzazione dovuta ad asma nei 6 mesi precedenti; trattamento con LABA, anticolinergici o antistaminici nelle 2 settimane precedenti e/o con corticosteroidi topici o intranasali e antagonisti dei leucotrieni nelle 4 settimane precedenti; variazione della dose di CSI nelle 4 settimane precedenti. I pazienti con riacutizzazione asmatica nel corso del periodo di run-in non sono stati ammessi alla fase di trattamento. Inoltre, i pazienti con un aumento del picco di flusso espiratorio (PEF)  $>15\%$  rispetto ai valori misurati durante lo screening, dopo un periodo di run-in di 2 settimane con una dose giornaliera

$\leq 1.000$  mcg di BDP o equivalente, non sono stati randomizzati. Questo valore limite è stato preso come parametro della risposta positiva al CSI, indicando che tali pazienti avrebbero potuto fare a meno della terapia di combinazione.

Lo studio è stato condotto in conformità alle linee guida della "Buona Pratica Clinica" raccomandate dalla Conferenza Internazionale sull'Armonizzazione. Il protocollo è stato approvato dal Comitato Etico di ciascun centro ed il consenso scritto è stato ottenuto da ciascun partecipante prima dell'inizio dello studio.

### Disegno dello studio

Lo studio è stato concepito con lo scopo di valutare la non inferiorità dell'associazione BDP/F rispetto a dosi equipotenti dell'associazione BUD/F.

Si è trattato di uno studio controllato di fase III, multinazionale, multicentrico, in doppio cieco, *double dummy*, randomizzato, a due gruppi paralleli. I pazienti selezionati sono stati sottoposti a 2 settimane di run-in prima di essere randomizzati nei due gruppi di studio. L'assunzione di salbutamolo per via inalatoria è stata consentita in qualunque momento purché  $\geq 6$  h prima delle prove di funzionalità respiratoria (PFR). I corticosteroidi orali sono stati consentiti solo in caso di riacutizzazioni asmatiche. La teofillina, il sodio cromoglicato o il sodio nedocromile assunti per inalazione o per via orale prima dell'inizio dello studio, sono stati consentiti a dosi costanti per tutto il periodo dello stesso. Il CSI è stato mantenuto a dosi invariate durante il periodo di run-in, mentre la somministrazione di tutti gli altri farmaci anti-asmatici è stata interrotta.

Alla fine del periodo di run-in, i sintomi e l'utilizzo di farmaci al bisogno sono stati rivisti e i pazienti, la cui asma non era adeguatamente controllata, sono stati randomizzati ad una fase di trattamento di 12 settimane con BDP/F 100/6 mcg pMDI (FOSTER<sup>™</sup>; Chiesi Farmaceutici) o BUD/F 200/6 mcg DPI (Symbicort<sup>®</sup> Turbuhaler<sup>®</sup>; AstraZeneca). Entrambi i farmaci sono stati somministrati in due inalazioni b.i.d. (mattina e sera) per ottenere dosi quotidiane di 400/24 mcg di BDP/F o 800/24 mcg di BUD/F. Poiché la formulazione dei farmaci differiva, ai pazienti di ciascun gruppo sono stati dati degli inalatori placebo dei rispettivi pMDI e DPI per garantire il doppio cieco (*double dummy*). I dispositivi e i rispettivi placebo erano identici nella forma e nel colore e ai pazienti è stato detto di fare due inalazioni da ciascun dispositivo, la mattina e la sera.

Ai pazienti è stato chiesto di tornare in clinica sei volte, con le seguenti tempistiche: ammissione allo studio (visita 1, inizio del periodo di run-in), fine del periodo di run-in/inizio del periodo di trattamento (visita 2, randomizzazione) e dopo 2, 4, 8 e 12 settimane di trattamento (visite 3, 4, 5 e 6).

### Parametri di valutazione

Come variabile primaria è stato considerato il PEF pre-dose del mattino misurato dai pazienti, almeno 12 ore dopo la dose della sera precedente, nelle ultime 2 settimane del periodo di trattamento (settimane 11–12). Le PFR sono state eseguite ad ogni visita prima dell'assunzione del farmaco almeno 12 ore dopo la dose della sera precedente. Con ciò si intende che la dose del mattino è stata assunta sul posto dopo le PFR.

Le PFR seguenti sono state eseguite secondo la procedura standard [24]: FEV<sub>1</sub>, capacità vitale forzata (FVC), PEF e flusso massimo espiratorio al 50% della capacità vitale (MEF<sub>50%</sub>). Il migliore di 3 valori è stato utilizzato per l'analisi.

I pazienti hanno utilizzato un misuratore di picco di flusso portatile (Piko-1; Qubisoft, Padova, Italia), conforme agli standard 2004 dell'American Thoracic Society, per misurare i valori pre-dose mattutini e serali di PEF e FEV<sub>1</sub>. Il migliore di tre valori è stato usato come dato per l'analisi. I pazienti hanno segnato i valori dei propri sintomi asmatici e l'eventuale assunzione di salbutamolo al bisogno, su un diario due volte al giorno (al mattino per la notte e la sera per il giorno) [5]. È stata calcolata la percentuale di giorni asintomatici e di giorni senza assunzione di salbutamolo (cioè senza sintomi per 24 h o senza utilizzo di salbutamolo).

L'incidenza delle riacutizzazioni asmatiche è stata calcolata ad ogni visita post basale. Le riacutizzazioni sono state classificate come lievi, moderate o gravi, come è stato descritto in precedenza [4].

Gli eventi avversi (AEs) sono stati riportati durante tutto il periodo dello studio. Anche i segni vitali (frequenza cardiaca e pressione sanguigna) sono stati misurati ad ogni visita. Alla visita basale e a fine studio è stato eseguito un ECG con misurazione dell' intervallo QT corretto (QTc). I pazienti hanno registrato le proprie assunzioni del farmaco sui diari due volte al giorno. Un range di somministrazioni programmate che va dal 75 al 125% è stato ritenuto adeguato per raggiungere un livello soddisfacente di adesione alla terapia.

**Statistica**

Il presente studio è stato concepito per valutare la non inferiorità di BDP/F *versus* BUD/F. Il calcolo del campione è stato fatto definendo il limite di non inferiorità come il limite inferiore dell'intervallo di confidenza (CI) unilaterale del 97,5% per una differenza tra le medie (LSMs) del PEF del

mattino  $\geq -20$  L·min<sup>-1</sup>. Stimando una DS di 45 L·min<sup>-1</sup> e una differenza prevista tra le medie uguale a zero, erano necessari 90 pazienti per gruppo per avere una potenza >80% per soddisfare la suddetta ipotesi [25]. BDP/F è stato definito equivalente a BUD/F laddove il limite inferiore del CI unilaterale del 97,5% per la differenza tra LSMs era  $\geq -20$  L·min<sup>-1</sup>.

L'analisi dei dati è stata eseguita sulle seguenti popolazioni: popolazione safety (SAF), composta da tutti i pazienti randomizzati per i quali ci sono state prove di assunzione del farmaco; popolazione intention-to-treat (ITT), ossia tutti i pazienti randomizzati che hanno ricevuto almeno una dose di farmaco oggetto dello studio e con almeno un dato post basale; popolazione ITT modificata (mITT), ossia escludendo i dati registrati nei 30 giorni seguenti l'assunzione di corticosteroidi orali per riacutizzazione asmatica; popolazione per-protocol (PP), ossia tutti i pazienti in analisi ITT senza violazioni maggiori del protocollo (ad es. scarsa aderenza alla terapia o alle procedure, uso di farmaci non consentiti). I valori post-basale mancanti sono stati sostituiti secondo il metodo della "last observation carried forward".

Lo stesso metodo è stato utilizzato per sostituire i dati registrati nei 30 giorni dopo l'assunzione di corticosteroidi orali per la popolazione mITT.

Come valori basali sono stati utilizzati i valori medi dell'ultima settimana del periodo di run-in per le variabili registrate quotidianamente dai pazienti sui diari ed i valori misurati alla visita della fine del run-in per le variabili misurate in clinica. Sono stati calcolati anche i valori medi bisettimanali durante l'intero periodo di studio per le variabili registrate sui diari. Le caratteristiche demografiche e basali sono state riassunte per mezzo di statistiche descrittive (numero di soggetti, media±SD, mediana, minimo e massimo) o distribuzioni di frequenza (numero e percentuale) ritenute adeguate.

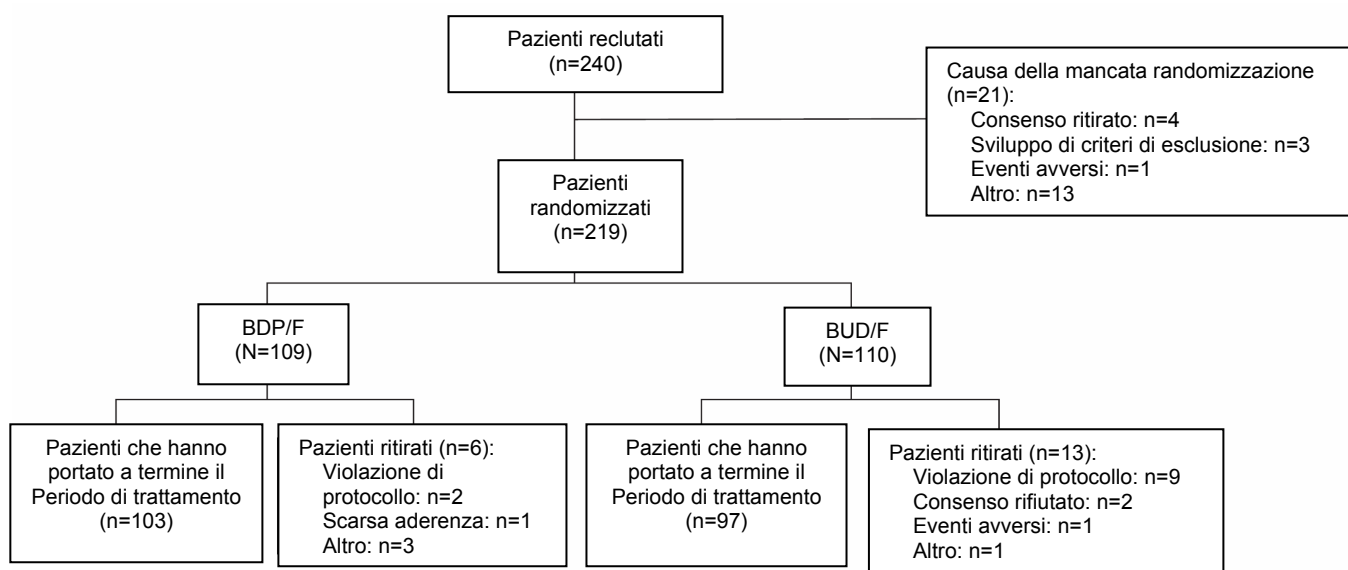

**GRAFICO 1.** Un diagramma che rappresenta il flusso dei pazienti. BDP/F: Beclometasone/formoterolo; BUD/F: budesonide/formoterolo.

Per l'analisi di efficacia primaria, è stato utilizzato il CI unilaterale del 97,5% per la differenza tra BDP/F e BUD/F nel PEF finale registrato dai pazienti sui diari per dimostrare la non inferiorità. È stato utilizzato un modello ANCOVA con termini di trattamento, regione geografica e valore basale come covariata. Per le variabili di efficacia secondaria è stato utilizzato lo stesso modello ANCOVA.

Il numero di pazienti con riacutizzazione asmatica nei due gruppi è stato analizzato per mezzo di distribuzioni di frequenza. È stato utilizzato un test del chi quadro per mettere a confronto i due gruppi di trattamento. Il tempo trascorso fino alla comparsa della prima riacutizzazione è stato comparato mediante le curve di Kaplan–Meier. Il numero di pazienti con AEs verificatisi durante il periodo di trattamento è stato analizzato per mezzo di distribuzione di frequenza. Le differenze tra i gruppi di trattamento sono state calcolate utilizzando un test del chi quadro o il metodo esatto di Fisher. Gli esiti dell'ECG sono stati presentati in termini di risultati normali/anormali, mentre l'intervallo QTc è stato analizzato per mezzo del CI del 95% per i valori finali da un modello ANCOVA.

## RISULTATI

La distribuzione dei pazienti e le caratteristiche basali sono mostrate nel grafico 1 e nella tabella 1. In totale sono stati reclutati 240 pazienti, 219 sono stati randomizzati, mentre 21 sono risultati non idonei. 109 (47,8%) pazienti sono stati assegnati in modo casuale al gruppo BDP/F e 110 (52,2%) a quello BUD/F. 6 pazienti nel gruppo BDP/F e 13 in quello BUD/F sono stati esclusi dallo studio mentre 103 pazienti nel gruppo BDP/F e 97 nel BUD/F hanno completato il periodo di studio di 3 mesi.

Un paziente nel gruppo BUD/F non ha dimostrato di aver assunto il farmaco oggetto dello studio. La SAF ha quindi incluso 218 pazienti (109 in ciascun gruppo).

Due pazienti trattati con BDP/F non presentavano dati post-basale e sono stati esclusi dall'analisi ITT. Anche quattro pazienti nel gruppo BDP/F e 10 in quello BUD/F sono stati esclusi dall'analisi PP a causa di una violazione maggiore del protocollo. Considerando l'esigua differenza tra il numero di pazienti nella popolazione ITT e PP (tabella 2), vengono mostrati soltanto i risultati della popolazione ITT.

**TABELLA 1** Caratteristiche basali dei due gruppi

|                                                               | BDP/F <sup>#</sup> | BUD/F       |
|---------------------------------------------------------------|--------------------|-------------|
| <b>Maschio</b>                                                | 45 (42,1)          | 46 (42,2)   |
| <b>Femmina</b>                                                | 62 (57,9)          | 63 (57,8)   |
| <b>Età (anni)</b>                                             | 43,4±12,3          | 46,0±11,1   |
| <b>Peso kg</b>                                                | 72,2±12,9          | 75,6±16,3   |
| <b>Altezza cm</b>                                             | 168,8±9,6          | 168,7±9,8   |
| <b>Allergie</b>                                               | 69 (64,5)          | 70 (64,2)   |
| <b>Dose diCSI mcg di BDP o equivalente</b>                    | 787,9±257,2        | 808,0±262,7 |
| <b>Tempo intercorso dalla prima diagnosi (anni)</b>           | 11,8±9,5           | 12,4±10,4   |
| <b>FEV<sub>1</sub> % pred</b>                                 | 70,5±10,7          | 69,3±9,7    |
| <b>FEV<sub>1</sub> L</b>                                      | 2,30±0,71          | 2,21±0,64   |
| <b>FEV<sub>1</sub> % incremento nel test di reversibilità</b> | 23,6±10,1          | 26,5±12,1   |
| <b>PEF del mattino L·min<sup>-1</sup></b>                     | 308,9±106,6        | 305,2±100,0 |
| <b>PEF della sera L·min<sup>-1</sup></b>                      | 317,5±112,1        | 315,0±98,5  |

I dati sono presentati come n (%) e media±SD. BDP/F: Beclometasone/formoterolo; BUD/F: budesonide/formoterolo; CSI: corticosteroidi inalati; FEV<sub>1</sub> volume espiratorio forzato nel primo secondo; % pred: % previsto; PEF: picco di flusso espiratorio. I valori p sono risultati non significativi per qualsiasi confronto tra i gruppi. <sup>#</sup>: due pazienti sono stati esclusi dalla popolazione intention-to-treat per mancanza di dati post-basale.

**TABELLA 2** Popolazioni per l'analisi

|                     | BDP/F                                                                                                                                                                                                                                                                                            | BUD/F                                                                                                                                                                                                                                                                                                                                                                                                                                                                                                                                                                                    |
|---------------------|--------------------------------------------------------------------------------------------------------------------------------------------------------------------------------------------------------------------------------------------------------------------------------------------------|------------------------------------------------------------------------------------------------------------------------------------------------------------------------------------------------------------------------------------------------------------------------------------------------------------------------------------------------------------------------------------------------------------------------------------------------------------------------------------------------------------------------------------------------------------------------------------------|
| <b>Randomizzati</b> | n=109                                                                                                                                                                                                                                                                                            | n=110                                                                                                                                                                                                                                                                                                                                                                                                                                                                                                                                                                                    |
| <b>SAF</b>          | n=109                                                                                                                                                                                                                                                                                            | n=109<br>Un paziente non ha dimostrato di aver assunto il farmaco (randomizzato e subito escluso, il diario non è stato compilato)                                                                                                                                                                                                                                                                                                                                                                                                                                                       |
| <b>ITT</b>          | n=107<br>Due pazienti non avevano dati post-basale per la variabile di efficacia primaria                                                                                                                                                                                                        | n=109                                                                                                                                                                                                                                                                                                                                                                                                                                                                                                                                                                                    |
| <b>m-ITT</b>        | n=107                                                                                                                                                                                                                                                                                            | n=109                                                                                                                                                                                                                                                                                                                                                                                                                                                                                                                                                                                    |
| <b>PP</b>           | n=103: quattro pazienti esclusi<br>Due pazienti a causa di un aumento >20% di PEF nella visita 2 rispetto alla visita 1<br>Due pazienti hanno fatto trascorrere un tempo >5 giorni tra le ultime due visite<br>Un paziente non ha assunto salbutamolo per >5 giorni durante il periodo di run-in | n=99: 10 pazienti esclusi<br>Quattro pazienti a causa di un aumento >20% di PEF nella visita 2 rispetto alla visita 1<br>Tre pazienti a causa di una scarsa aderenza al farmaco oggetto dello studio<br>Due pazienti non hanno assunto salbutamolo per >5 giorni durante il periodo di run-in<br>Un paziente a causa di discrepanze significative che rendevano inaffidabile il test tra le prove di funzionalità polmonare, ossia FEV <sub>1</sub> e PEF, monitorate giornalmente dai pazienti e misurate sul posto<br>Un paziente per esposizione al farmaco in questione <2 settimane |

BDP/F: beclometasone/formoterolo; BUD/F: budesonide/formoterolo; SAF: popolazione campione sana; ITT: popolazione intention-to-treat; m-ITT: ITT modificata; PP: popolazione per-protocol; PEF: picco di flusso espiratorio; FEV<sub>1</sub>: volume espiratorio forzato in un secondo. I pazienti possono essere esclusi per più di un motivo.

I dati basali (tabella 1) dei due gruppi erano ben bilanciati in termini di statistiche demografiche, funzionalità polmonare, sintomi e tempo trascorso dalla prima diagnosi di asma. I due gruppi presentavano un livello di gravità dell'asma simile e non sono state registrate differenze tra i gruppi nella dose di CSI.

L'aderenza dei pazienti in entrambi i gruppi è stata simile, con una percentuale media di farmaco somministrato del 96,8±3,2% e 95,6±7,8% nel gruppo BDP/F e BUD/F, rispettivamente.

**EFFICACIA**

**Funzionalità polmonare**

Per quanto riguarda l'outcome primario, il PEF pre-dose del mattino nel corso delle ultime 2 settimane di trattamento, la differenza tra le medie (LSMs) del gruppo BDP/F (338,3 L·min<sup>-1</sup>) e il gruppo BUD/F (337,8 L·min<sup>-1</sup>) era di 0,49 L·min<sup>-1</sup>. Il CI unilaterale del 97,5% per questa differenza era di -11,97, valore compreso nel limite pre-specificato di -20 L·min<sup>-1</sup>, mostrando in tal modo che BDP/F era non inferiore a BUD/F. Inoltre, il CI bilaterale del 95% per la differenza tra LSMs era da -11,97 a 12,95.

Nel confronto con i valori basali, entrambi i gruppi hanno mostrato miglioramenti marcati e significativi nel PEF del mattino; gli incrementi medi dal basale all'end-point erano 29,43±52,8 L·min<sup>-1</sup> (95% CI: 19,31-39,54) e 28,63±43,4 L·min<sup>-1</sup> (20,39-36,87) nei gruppi BDP/F e BUD/F, rispettivamente (fig. 2). In maniera analoga, non è stata rilevata nessuna differenza significativa nel PEF serale alla fine del trattamento, mentre entrambi i gruppi hanno mostrato, in confronto ai valori basali, un incremento significativo. I miglioramenti medi nelle 2 settimane finali erano 27,50±53,35 L·min<sup>-1</sup> e 27,43±39,39 L·min<sup>-1</sup> nei gruppi BDP/F e BUD/F rispettivamente (CI del 95% per la differenza tra LSM: da -12,26 a 11,94). Un aumento significativo rispetto al basale è stato dimostrato per il FEV<sub>1</sub> misurato giornalmente dai pazienti di entrambi i gruppi, senza differenze significative tra questi alla fine del trattamento.

I risultati delle PFR misurate durante le visite (FEV<sub>1</sub>, FVC, PEF e MEF<sub>50%</sub>) sono mostrati in tabella 3 e nel grafico 3. Sono stati riscontrati miglioramenti significativi rispetto al basale in entrambi i gruppi dalla settimana 2 in poi in tutti i parametri relativi alla funzionalità polmonare. Non è stata rilevata nessuna differenza significativa tra i gruppi alla fine del trattamento.

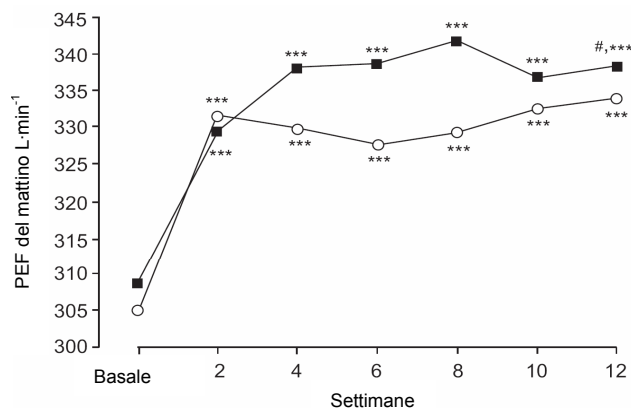

**GRAFICO 2.** picco di flusso espiratorio medio del mattino (PEF) misurato quotidianamente dai pazienti dei due gruppi. ■ : Beclometasone/formoterolo; ○ : budesonide/formoterolo. #: p=non significativo tra i trattamenti. \*\*\*: p<0,001 versus basale.

**Sintomi**

I valori dei sintomi clinici hanno mostrato in entrambi i gruppi una riduzione significativa rispetto ai valori basali dalle prime 2 settimane di trattamento in poi ed una riduzione dell'uso giornaliero di salbutamolo al bisogno, senza differenze significative tra i gruppi alla fine del trattamento. Le riduzioni medie rispetto al basale all'end-point (settimane 11-12) nel punteggio dei sintomi diurni sono state -0,93±0,78 U e -0,86±0,86 U nel gruppo BDP/F e BUD/F rispettivamente (p<0,001 versus basale). Le variazioni medie rispetto al basale alla fine del trattamento nel punteggio dei sintomi notturni sono state -0,73±0,75 U e -0,66±0,84 U nel gruppo BDP/F e BUD/F rispettivamente (p<0,001 versus basale). L'uso giornaliero di farmaco al bisogno è diminuito significativamente da 2,16±1,15 puff al giorno nell'ultima settimana di run-in a 0,76±0,92 puff al giorno nelle ultime 2 settimane del periodo di trattamento nel gruppo BDP/F, e da 2,28±1,50 a 0,87±1,04 puff al giorno nel gruppo BUD/F.

Le percentuali medie dei giorni asintomatici e di quelli che non hanno necessitato di salbutamolo al bisogno durante l'intero periodo del trattamento sono mostrate nel grafico 4. Come evidente, non esistono differenze significative tra i due gruppi, ma la significatività statistica è raggiunta quando i dati vengono confrontati con i valori basali (p<0,001).

**TABELLA 3**

Parametri di funzionalità polmonare nei due gruppi misurate durante le visite in clinica<sup>#</sup>

| Misure                               | Gruppo | Settimana 2 | Settimana 4 | Settimana 8 | Settimana 12 | valore p |
|--------------------------------------|--------|-------------|-------------|-------------|--------------|----------|
| FEV <sub>1</sub> L                   | BDP/F  | 0,26±0,38   | 0,29±0,46   | 0,33±0,49   | 0,28±0,47    | 0,354    |
|                                      | BUD/F  | 0,33±0,41   | 0,37±0,44   | 0,40±0,44   | 0,33±0,44    |          |
| FVC L                                | BDP/F  | 0,23±0,47   | 0,27±0,53   | 0,33±0,54   | 0,26±0,52    | 0,557    |
|                                      | BUD/F  | 0,26±0,49   | 0,31±0,53   | 0,34±0,52   | 0,21±0,52    |          |
| PEF L·min <sup>-1</sup>              | BDP/F  | 52,29±7281  | 59,99±74,03 | 63,66±74,28 | 56,04±72,97  | 0,806    |
|                                      | BUD/F  | 55,71±74,35 | 57,47±71,25 | 64,36±75,94 | 53,16±77,29  |          |
| MEF <sub>50%</sub> L·s <sup>-1</sup> | BDP/F  | 0,42±0,66   | 0,43±0,71   | 0,48±0,84   | 0,43±0,82    | 0,512    |
|                                      | BUD/F  | 0,48±0,69   | 0,53±0,75   | 0,63±0,86   | 0,50±0,80    |          |

I dati sono presentati come media±SD, se non altrimenti indicato. FEV<sub>1</sub>, volume espiratorio forzato nel primo secondo; FVC: capacità vitale forzata; PEF: picco di flusso espiratorio; MEF<sub>50%</sub>: flusso espiratorio massimo al 50% della capacità vitale; BDP/F: beclometasone/formoterolo; BUD/F: budesonide/formoterolo. I valori di p fanno riferimento al confronto tra i gruppi nei valori finali (settimana 12, ultima visita). #: variazioni medie dai valori basali (popolazione intention-to-treat)

### Riacutizzazioni

Le riacutizzazioni asmatiche si sono verificate in 29 pazienti, 17 (15,9%) nel gruppo BDP/F e 12 (11,0%) nel gruppo BUD/F. Non si sono verificate riacutizzazioni gravi, mentre riacutizzazioni moderate, che hanno richiesto un ciclo di corticosteroidi orali, sono state riscontrate solo in due pazienti in ciascun gruppo. Il rapporto tra i giorni di riacutizzazione ed i giorni di esposizione è stato  $0,013 \pm 0,04$  nel gruppo BDP/F e  $0,023 \pm 0,11$  nel gruppo BUD/F ( $p=0,38$ ), ossia statisticamente non differenti. Il tempo (mediana (range)) trascorso fino alla prima riacutizzazione è stato di 29 (1–77) giorni nel gruppo BDP/F e 24 (1–69) giorni nel gruppo BUD/F ( $p=0,342$  tra i gruppi nella valutazione delle curve di sopravvivenza di Kaplan–Meier).

### Tollerabilità

Non è stata rilevata nessuna differenza significativa tra i due gruppi di trattamento come riportato nella tabella 4. Eventi avversi sono stati riportati da 15 (13,8%) pazienti nel gruppo BDP/F e 18 (16,5%) nel gruppo BUD/F ( $p$ =non significativo), ma nessuno è stato classificato come grave. Solo un paziente nel gruppo BUD/F ha interrotto lo studio a causa di dolore alla gola, palpitazioni e tremori alle mani.

Non è stata rilevata alcuna variazione di pressione sanguigna in nessuno dei due gruppi durante il periodo dello studio. Un esiguo ma significativo aumento della frequenza cardiaca è stato rilevato solo alla visita 3 nel gruppo BUD/F ( $1,67 \pm 6,71$  bpm; 95% CI: 0,39–2,95). Nessun'altra variazione è stata rilevata nei due gruppi. Nei due gruppi non è stata registrata nessuna variazione dell'ECG o evidenza di prolungamento dell'intervallo QTc.

### DISCUSSIONE

Nel presente studio, gli effetti del nuovo pMDI contenente l'associazione BDP/F sono stati confrontati con quelli del DPI Turbuhaler® contenente l'associazione BUD/F nei pazienti con asma da moderata a grave per un periodo di 3 mesi. I risultati dello studio hanno mostrato che 400/24 mcg al giorno di BDP/F hanno la stessa efficacia di 800/24 mcg al giorno di BUD/F sul PEF del mattino nelle ultime 2 settimane di trattamento. Questo è stato confermato anche dalle altre variabili di funzionalità polmonare e di efficacia clinica.

I due gruppi di trattamento erano ben bilanciati in termini di gravità dell'asma e di valori basali di tutte le variabili valutate. La popolazione di entrambi i gruppi aveva reali possibilità di miglioramento dal basale all'end-point, come dimostrato dagli aumenti nella funzionalità polmonare nel corso dello studio, mostrando un'effettiva equivalenza tra i due trattamenti. Inoltre, questo conferma che l'equivalenza non è dovuta alla mancanza di efficacia in entrambi i trattamenti o al massimo potenziale della funzionalità polmonare già presente prima del trattamento[26]. Gli aumenti ottenuti in entrambi i gruppi nella variabile di efficacia primaria sono stati significativi sia a livello statistico che clinico, avvalorando la capacità del presente studio di rilevare qualsiasi eventuale differenza esistente tra i gruppi.

I risultati degli altri parametri relativi alla funzionalità polmonare, misurati sia dai pazienti due volte al giorno sia durante le visite in clinica, hanno mostrato miglioramenti simili nei due gruppi, senza alcuna differenza significativa tra i trattamenti in esame.

Sono stati osservati anche miglioramenti simili nei due gruppi nei sintomi clinici e nell'uso di salbutamolo al bisogno, che ha mostrato una diminuzione significativa dai valori basali senza differenze tra i gruppi. Allo stesso modo, non è stata rilevata alcuna differenza nell'incidenza di riacutizzazioni asmatiche e nel periodo trascorso fino alla prima riacutizzazione. Ad ogni modo non è stato possibile nel presente studio trattare le riacutizzazioni come end-point primario, poiché il tempo di esposizione è stato limitato e sarebbe stato necessario un numero maggiore di pazienti per rilevare le potenziali differenze tra i trattamenti.

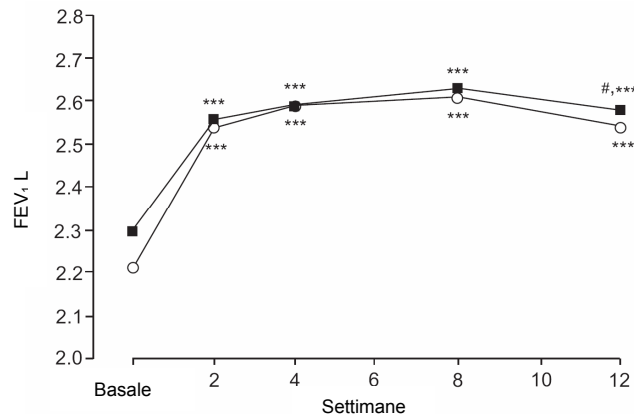

**GRAFICO 3.** Volume espiratorio forzato nel primo secondo (FEV<sub>1</sub>) misurato in clinica nei due gruppi.

■ : Beclometasone/formoterolo; ○ : budesonide/formoterolo.  
#:  $p$ =non significativo tra i trattamenti.  
\*:  $p < 0,001$  versus basale.

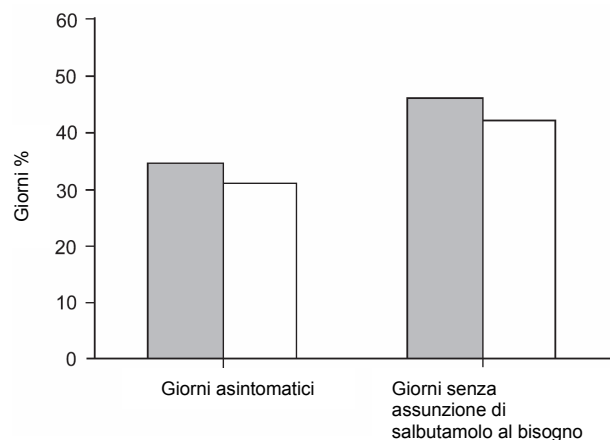

**GRAFICO 4.** Percentuale dei giorni asintomatici e di quelli senza assunzione di salbutamolo al bisogno nella fase di trattamento.

■ : Beclometasone/formoterolo;  
□ : budesonide/formoterolo.  
.  $p$ =non significativo nei confronti tra i gruppi.

I due trattamenti combinati hanno mostrato un profilo di tollerabilità simile. Durante i 3 mesi di studio, la nuova associazione BDP/F è stata ben tollerata tanto quanto l'associazione standard contenente BUD, un CSI che dimostra una bassa attività sistemica [27]. Il peggioramento dell'asma e le infezioni del tratto respiratorio superiore/inferiore sono stati gli eventi più comuni, molto probabilmente dovuti ad affezioni stagionali più che a problemi di tollerabilità del farmaco, come suggerito dalla loro simile frequenza nei due gruppi.

| TABELLA 4                                                                                                  |           |           |
|------------------------------------------------------------------------------------------------------------|-----------|-----------|
| Eventi avversi rilevati in >2% di pazienti, numeri e percentuali nella popolazione safety presa in analisi |           |           |
| Evento avverso                                                                                             | BDP/F     | BUD/F     |
| N. soggetti                                                                                                | 109       | 109       |
| Peggioramento dell'asma                                                                                    | 16 (14,7) | 12 (11,0) |
| Infezioni del tratto respiratorio                                                                          | 6 (5,5)   | 7 (6,4)   |
| Bronchite                                                                                                  | 7 (6,4)   | 5 (4,6)   |
| Rinofaringite                                                                                              | 2 (1,8)   | 5 (4,6)   |
| Herpes simplex                                                                                             | 3 (2,8)   | 1 (0,9)   |
| Tremore                                                                                                    | 1 (0,9)   | 3 (2,8)   |

I dati sono presentati come n (%), se non altrimenti indicato.  
BDP/F: Beclometasone/formoterolo; BUD/F: budesonide/formoterolo.

Non è stata segnalata alcuna evidenza di effetti negativi sull'ECG o sul prolungamento dell'intervallo QTc, un potenziale effetto cardiovascolare dei farmaci  $\beta_2$ -adrenergici [28].

Sia l'aderenza dei pazienti che la funzionalità polmonare a lungo termine traggono beneficio dal trattamento con un solo inalatore contenente LABA e CSI [3,29]. Questo regime terapeutico consente l'attenuazione dei sintomi grazie all'effetto del LABA, aumentando l'adesione, mentre il paziente stesso continua a ricevere una dose di mantenimento di CSI che agisce sull'infiammazione cronica delle vie respiratorie, migliorando così il controllo della malattia. Inoltre, l'uso di associazioni fisse riduce i costi di trattamento diretti ed indiretti rispetto alla somministrazione degli stessi farmaci tramite inalatori separati [9]. Prendendo in considerazione i comprovati vantaggi offerti dalla somministrazione combinata di LABA/CSI, la nuova associazione BDP/F rappresenta una valida alternativa nel trattamento dell'asma. In considerazione del fatto che il BDP somministrato tramite pMDI è un affermato CSI utilizzato a livello mondiale, la disponibilità di una nuova associazione BDP/F può anche consentire ai pazienti non controllati adeguatamente con CSI da solo di continuare ad utilizzare lo stesso dispositivo con la stessa tecnica di inalazione e la stessa molecola.

Sebbene la dose nominale giornaliera di BDP utilizzata nel presente studio sia due volte inferiore rispetto all'equipotente dose giornaliera di BUD presente nell'associazione di BUD/F, non si può asserire che il BDP extrafine sia due volte più potente della BUD, poiché la dose minima necessaria per ottenere il controllo dell'asma non è stata stabilita.

Allo stesso modo, la differenza nella dose di corticosteroidi tra i due gruppi di trattamento non implica una differenza nell'esposizione sistemica, poiché essa dipende non solo dalla dose nominale ma anche dalla quantità di farmaco che riesce a raggiungere i polmoni e dalle proprietà farmacocinetiche dei due corticosteroidi. Studi precedenti hanno indicato che la dose di BUD contenuta in particelle fini, ossia la quantità di farmaco che si suppone riesca a raggiungere le vie respiratorie inferiori dopo un'inalazione dell'associazione DPI 200/6 mcg BUD/F è 46,0 mcg [30], mentre la dose di BDP contenuta in particelle fini, dopo un'inalazione di BDP/F 100/6 mcg extrafine è 34,5 mcg [31].

In conclusione, il presente studio è il primo ad aver confrontato l'efficacia e la sicurezza di un nuovo pMDI contenente l'associazione BDP/F con una associazione standard di BUD/F in pazienti con asma da moderata a grave i cui sintomi non erano adeguatamente controllati con il solo CSI. I risultati hanno mostrato che le due associazioni testate hanno prodotto benefici equivalenti per quanto riguarda la funzionalità polmonare ed i sintomi clinici e hanno portato ad una riduzione significativa dell'uso di farmaci al bisogno. Inoltre, non è stata rilevata alcuna differenza significativa tra i gruppi in termini di frequenza delle riacutizzazioni dell'asma e/o di necessità di una terapia di prevenzione aggiuntiva.

Il presente studio dimostra che il nuovo inalatore dosato pressurizzato contenente la associazione beclometasone/formoterolo rappresenta una valida alternativa nel trattamento dell'asma.

## RINGRAZIAMENTI

I membri del gruppo di studio ICAT SY sono: J. Zarkovic (Ambulance for Paediatrics and Pulmonology, Wien, Austria); K. Buczyłko (Centrum Alergologii, Lodz, Poland), I. Grzelewska-Rzymowska (Uniwersytet Medyczny, Lodz, Poland), B. Łukasiewicz-Swierczyn'ska (Nzoz "Medex" Poradnia Alergologiczna, Bielsko-Biala, Poland), B. Panaszek (Nzoz Lekarze Specjalisci, Wroclaw, Poland), W. Piotrowski (Prywatny Gabinet Lekarski, Lodz, Poland), M. Stobiecki (Centrum Usług Medycznych, Krakow, Poland); Y. Feschenko (Pulmonology Dept, Therapy and Clinical Pharmacology of Lung Diseases, Institute of Physiology and Pulmonology Academy of Medical Sciences, Kiev, Ukraine), N. Gorovenko (Dept of Medical Genetics, Clinical Immunology and Allergology, Kiev Medical Academy of Post-diploma Education, Kiev, Ukraine), L. Yashyna (Dept of Diagnostic, Therapy and Clinical Pharmacology of Lung Diseases, Institute of Physiology and Pulmonology Academy of Medical Sciences, Kiev, Ukraine), T. Pertseva (Internal Medicine Dept, Dniepropetrovsk State Medical Academy, City Clinical Hospital, Dniepropetrovsk, Ukraine), J. Semidotskaya (Pulmonological and Allergological Dept, Kharkov Regional Clinical Hospital, Kharkov, Ukraine), and V. Vyacheslavovich Yefimov (Pulmonology Dept, Institute of Therapy, Ukrainian Academy of Medical Science, Kharkiv, Ukraine).

## RIFERIMENTI BIBLIOGRAFICI

- 1 Global Initiative for Asthma, National Institute of Health, National Heart Lung and Blood Institute, NHLBI/WHO Workshop Report. Global strategy for asthma management and prevention. NHLBI/WHO workshop report no. 02-3659 January 1995, updated 2003. Bethesda, NHLBI, 2003.
- 2 Bateman ED, Bantje TA, Joao Gomes M, *et al.* Combination therapy with single inhaler budesonide/formoterol compared with high dose of fluticasone propionate alone in patients with moderate persistent asthma. *Am J Respir Med* 2003; 2: 275–281.
- 3 Laloo UG, Malolepszy J, Kozma D, *et al.* Budesonide and formoterol in a single inhaler improves asthma control compared with increasing the dose of corticosteroid in adults with mild-to-moderate asthma. *Chest* 2003; 123:1480–1487.

- 4** Pauwels RA, Lofdahl CG, Postma DS, *et al.* Effect of inhaled formoterol and budesonide on exacerbations of asthma. Formoterol and Corticosteroids Establishing Therapy (FACET) International Study Group. *N Engl J Med* 1997; 337: 1405–1411.
- 5** Ringdal N, Chuchalin A, Chovan L, Tudoric N, Maggi E, Whitehead PJ. Evaluation of different inhaled combination therapies (EDICT): a randomised, double-blind comparison of Seretide (50/250 microg bd) Diskus *versus* formoterol (12 microg bd) and budesonide (800 microg bd) given concurrently (both *via* Turbuhaler) in patients with moderate-to-severe asthma. *Respir Med* 2002; 96: 851–861.
- 6** Tal A, Simon G, Vermeulen JH, *et al.* Budesonide/formoterol in a single inhaler *versus* inhaled corticosteroids alone in the treatment of asthma. *Pediatr Pulmonol* 2002; 34: 342–350.
- 7** Aubier M, Pieters WR, Schlosser NJ, Steinmetz KO. Salmeterol/fluticasone propionate (50/500 microg) in combination in a Diskus inhaler (Seretide) is effective and safe in the treatment of steroid-dependent asthma. *Respir Med* 1999; 93: 876–884.
- 8** Chapman KR, Ringdal N, Backer V, Palmqvist M, Saarelainen S, Briggs M. Salmeterol and fluticasone propionate (50/250 microg) administered *via* combination Diskus inhaler: as effective as when given *via* separate Diskus inhalers. *Can Respir J* 1999; 6: 45–51.
- 9** Rosenhall L, Elvstrand A, Tilling B, *et al.* One-year safety and efficacy of budesonide/formoterol in a single inhaler (Symbicort Turbuhaler) for the treatment of asthma. *Respir Med* 2003; 97: 702–708.
- 10** Brogden RN, Heel RC, Speight TM, Avery GS. Beclomethasone dipropionate. A reappraisal of its pharmacodynamic properties and therapeutic efficacy after a decade of use in asthma and rhinitis. *Drugs* 1984; 28: 99–126.
- 11** Fireman P, Prenner BM, Vincken W, Demedts M, Mol SJ, Cohen RM. Long-term safety and efficacy of a chlorofluorocarbon-free beclomethasone dipropionate extrafine aerosol. *Ann Allergy Asthma Immunol* 2001; 86:557–565.
- 12** Pedersen S, Warner J, Wahn U, *et al.* Growth, systemic safety, and efficacy during 1 year of asthma treatment with different beclomethasone dipropionate formulations: an open-label, randomized comparison of extrafine and conventional aerosols in children. *Pediatrics* 2002; 109: e92.
- 13** Van Schayck CP, Donnell D. The efficacy and safety of QVAR (hydrofluoroalkane-beclomethasone dipropionate extrafine aerosol) in asthma (part 1): an update of clinical experience in adults. *Int J Clin Pract* 2004; 58:678–688.
- 14** Bai TR, Knight DA. Structural changes in the airways in asthma: observations and consequences. *Clin Sci (Lond)* 2005; 108: 463–477.
- 15** Bel EH. Clinical phenotypes of asthma. *Curr Opin Pulm Med* 2004; 10: 44–50.
- 16** Boxall C, Holgate ST, Davies DE. The contribution of transforming growth factor- $\beta$  and epidermal growth factor signalling to airway remodelling in chronic asthma. *Eur Respir J* 2006; 27: 208–229.
- 17** Hamid Q, Song Y, Kotsimbos TC, *et al.* Inflammation of small airways in asthma. *J Allergy Clin Immunol* 1997; 100:44–51.
- 18** Sutherland ER, Martin RJ. Distal lung inflammation in asthma. *Ann Allergy Asthma Immunol* 2002; 89: 119–124.
- 19** Vignola AM, Riccobono L, Profita M, *et al.* Effects of low doses of inhaled fluticasone propionate on inflammation and remodelling in persistent-mild asthma. *Allergy* 2005; 60: 1511–1517.
- 20** Wenzel S. Severe asthma in adults. *Am J Respir Crit Care Med* 2005; 172: 149–160.
- 21** Leach CL, Davidson PJ, Boudreau RJ. Improved airway targeting with the CFC-free HFA-beclomethasone metered-dose inhaler compared with CFC-beclomethasone. *Eur Respir J* 1998; 12: 1346–1353.
- 22** Vanden Burgt JA, Busse WW, Martin RJ, Szeffler SJ, Donnell D. Efficacy and safety overview of a new inhaled corticosteroid, QVAR (hydrofluoroalkane-beclomethasone extrafine inhalation aerosol), in asthma. *J Allergy Clin Immunol* 2000; 106: 1209–1226.
- 23** Bousquet J. Introduction. Modulite: simplifying the changeover. *Respir Med* 2002; 96: Suppl. D, S1–S2.
- 24** Quanjer PH, Tammeling GJ, Cotes JE, Pedersen OF, Peslin R, Yernault JC. Lung volumes and forced ventilatory flows. Report Working Party Standardization of Lung Function Tests, European Community for Steel and Coal. Official Statement of the European Respiratory Society. *Eur Respir J Suppl* 1993; 16: 5–40.
- 25** Jones B, Jarvis P, Lewis JA, Ebbutt AF. Trials to assess equivalence: the importance of rigorous methods. *BMJ* 1996; 313: 36–39.
- 26** Ebbutt AF, Frith L. Practical issues in equivalence trials. *Stat Med* 1998; 17: 1691–1701.
- 27** O'Byrne PM, Pedersen S. Measuring efficacy and safety of different inhaled corticosteroid preparations. *J Allergy Clin Immunol* 1998; 102: 879–886.
- 28** Rabe KF. Formoterol in clinical practice--safety issues. *Respir Med* 2001; 95: Suppl. B, S21–S25.
- 29** Lotvall J. Combination therapy in asthma--fixed or variable dosing in different patients? *Curr Med Res Opin* 2004; 20:1711–1727.
- 30** Tarsin WY, Pearson SB, Assi KH, Chrystyn H. Emitted dose estimates from Seretide Diskus and Symbicort Turbuhaler following inhalation by severe asthmatics. *Int J Pharm* 2006; 316: 131–137.
- 31** Lewis D, Brambilla G, Church T. BDP and formoterol association within a combination HFA solution MDI. *Respir Drug Delivery* 2006; 3: 939–942.
